# Supplementary material for: Development Education. A Brief Description of the Project and an Interim Definition of Development Education.
Source: MDPI journal article supplement (doi:10.3390/cancers15235532), 1984-01-01
Supplement: s1 [file s1]

Supplementary Materials

# Real-World Systemic Treatment Patterns after Atezolizumab and Bevacizumab in Patients with Hepatocellular Carcinoma in the United States

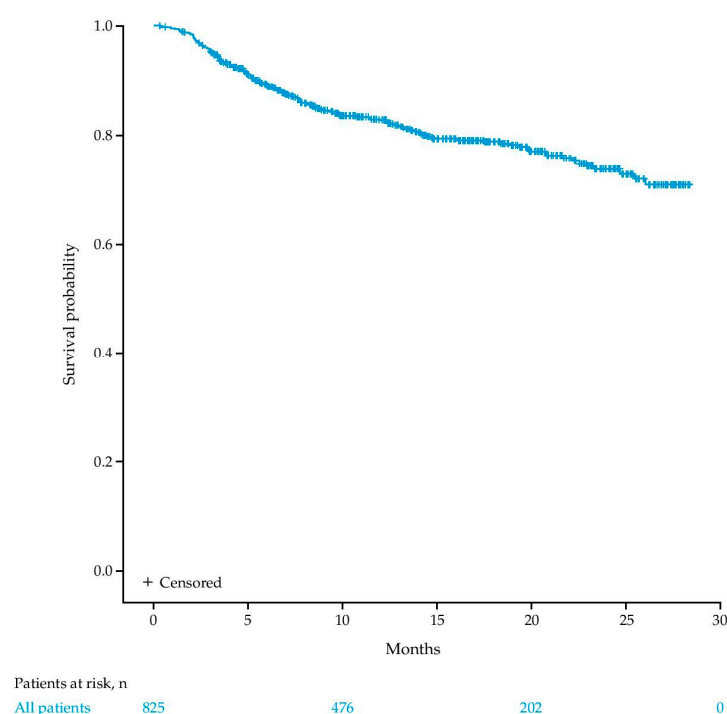

**Supplementary Figure S1.** Time to next treatment among all individuals over the entire post-index period. Post-index period defined as the  $\geq 2$  months after atezo+bev initiation (index date). Individuals were censored at the end of data availability or end of the study period, whichever came first. Switchers defined as individuals with claims for any therapy other than atezo+bev in the post-index period. Abbreviations: atezo+bev, atezolizumab plus bevacizumab.

**Supplementary Table S1.** Attrition of the study sample of (a) all individuals receiving front-line atezolizumab plus bevacizumab and (b) individuals receiving front-line atezolizumab plus bevacizumab with initiation on different days

(a)

| Steps | Criteria                                                                                                                                                                           | Excluded, <i>n</i> (%) | Remaining, <i>n</i> (%) |
|-------|------------------------------------------------------------------------------------------------------------------------------------------------------------------------------------|------------------------|-------------------------|
| 1     | Individuals with $\geq 1$ claim with an HCC diagnosis code * in any position in all available data prior to the index date (date of initiation of combination therapy)             | 758 (13)               | 2,515 (44)              |
| 2     | Individuals without any systemic therapy (sorafenib, regorafenib, lenvatinib, cabozantinib, nivolumab, pembrolizumab, ramucirumab, and ipilimumab) in the 3-month pre-index period | 85 (1)                 | 2,430 (42)              |
| 3     | Individuals without any non-TACE <sup>†</sup> chemotherapy of interest in the 3-month pre-index period                                                                             | 38 (1)                 | 2,392 (42)              |
| 4     | Individuals $\geq 18$ years of age on the index date                                                                                                                               | 4 (<1)                 | 2,388 (42)              |
| 5     | Individuals with $\geq 1$ pharmacy claim in LRx and $\geq 1$ medical claim in Dx in the 3-month pre-index period                                                                   | 194 (3)                | 2,194 (38)              |
| 6     | Individuals with pharmacy and provider stability <sup>‡</sup> for the 3-month pre-index period                                                                                     | 319 (6)                | 1,875 (33)              |
| 7     | Individuals with $\geq 1$ pharmacy claim in LRx and $\geq 1$ medical claim in Dx in the 2-month post-index period                                                                  | 435 (8)                | 1,440 (25)              |
| 8     | Individuals with pharmacy and provider stability <sup>‡</sup> for the 2-month post-index period                                                                                    | 10 (<1)                | 1,430 (25)              |
| 9     | Exclusion of individuals with $\geq 1$ diagnosis code for any primary cancer types in all available data prior to the index date (including the index date)                        | 605 (11)               | 825 (14)                |

(b)

| Steps | Criteria                                                                                                                                                                           | Excluded, <i>n</i> (%) | Remaining, <i>n</i> (%) |
|-------|------------------------------------------------------------------------------------------------------------------------------------------------------------------------------------|------------------------|-------------------------|
| 1     | Individuals with $\geq 1$ claim with an HCC diagnosis code * in any position in all available data prior to the index date (latter claim for atezo or bev)                         | 28 (1)                 | 13 (1)                  |
| 2     | Individuals without any systemic therapy (sorafenib, regorafenib, lenvatinib, cabozantinib, nivolumab, pembrolizumab, ramucirumab, and ipilimumab) in the 3-month pre-index period | 2 (<1)                 | 11 (<1)                 |
| 3     | Individuals without any non-TACE <sup>†</sup> chemotherapy of interest in the 3-month pre-index period                                                                             | 0 (0)                  | 11 (<1)                 |
| 4     | Individuals $\geq 18$ years of age on the index date                                                                                                                               | 0 (0)                  | 11 (<1)                 |
| 5     | Individuals with $\geq 1$ pharmacy claim in LRx and $\geq 1$ medical claim in Dx in the 3-month pre-index period                                                                   | 0 (0)                  | 11 (<1)                 |
| 6     | Individuals with pharmacy and provider stability <sup>‡</sup> for the 3-month pre-index period                                                                                     | 1 (<1)                 | 10 (<1)                 |
| 7     | Individuals with $\geq 1$ pharmacy claim in LRx and $\geq 1$ medical claim in Dx in the 2-month post-index period                                                                  | 2 (<1)                 | 8 (<1)                  |
| 8     | Individuals with pharmacy and provider stability <sup>‡</sup> for the 2-month post-index period                                                                                    | 8 (<1)                 | 0 (0)                   |

|                                                                                                                                                                                                                                                                                                                                                                                                                                                                                                                                                                                                                                                                                                                                                                                 |                                                                                                                                                             |   |   |
|---------------------------------------------------------------------------------------------------------------------------------------------------------------------------------------------------------------------------------------------------------------------------------------------------------------------------------------------------------------------------------------------------------------------------------------------------------------------------------------------------------------------------------------------------------------------------------------------------------------------------------------------------------------------------------------------------------------------------------------------------------------------------------|-------------------------------------------------------------------------------------------------------------------------------------------------------------|---|---|
| 9                                                                                                                                                                                                                                                                                                                                                                                                                                                                                                                                                                                                                                                                                                                                                                               | Exclusion of individuals with $\geq 1$ diagnosis code for any primary cancer types in all available data prior to the index date (including the index date) | – | – |
|                                                                                                                                                                                                                                                                                                                                                                                                                                                                                                                                                                                                                                                                                                                                                                                 |                                                                                                                                                             |   |   |
|                                                                                                                                                                                                                                                                                                                                                                                                                                                                                                                                                                                                                                                                                                                                                                                 |                                                                                                                                                             |   |   |
| <p>* HCC diagnosis code (ICD-10: C22.*; ICD-9: 155.*); † Any of the following chemotherapies are considered to be TACE if <math>\leq 2</math> claims for the same therapy are observed in the 3-month pre-index period: doxorubicin, doxorubicin HCl cisplatin, doxorubicin HCl liposome, epirubicin, epirubicin HCl, mitomycin, mitoxantrone HCl, gemcitabine HCl, and idarubicin HCl; ‡ Any pharmacy/provider the individual visited during the 12-month pre-index period and anytime post index. Abbreviations: atezo, atezolizumab; bev, bevacizumab; Dx, IQVIA medical claims data; HCC, hepatocellular carcinoma; HCl, hydrochloride; ICD, International Classification of Disease; LRx, IQVIA longitudinal prescription data; TACE, transarterial chemoembolization.</p> |                                                                                                                                                             |   |   |

**Supplementary Table S2.** Treatment distribution by sequence in overall study population and individuals with at least 3, 6, 9, and 12 months of follow-up

| Treatments, <i>n</i> (%)                                                      | Duration of follow-up        |                                |                                |                                |                                 |
|-------------------------------------------------------------------------------|------------------------------|--------------------------------|--------------------------------|--------------------------------|---------------------------------|
|                                                                               | Overall<br>( <i>N</i> = 825) | ≥3 months<br>( <i>n</i> = 749) | ≥6 months<br>( <i>n</i> = 711) | ≥9 months<br>( <i>n</i> = 623) | ≥12 months<br>( <i>n</i> = 548) |
| <b>First treatment</b>                                                        |                              |                                |                                |                                |                                 |
| Atezo+bev                                                                     | 825 (100)                    | 749 (100)                      | 711 (100)                      | 623 (100)                      | 548 (100)                       |
| Discontinued first treatment<br>without second treatment<br>at last follow-up | 456 (55)                     | 72 (10)                        | 256 (36)                       | 308 (49)                       | 330 (60)                        |
| Remaining on first treatment<br>at last follow-up                             | 221 (27)                     | 648 (87)                       | 384 (54)                       | 219 (35)                       | 123 (22)                        |
| <b>Second treatment, any</b>                                                  | 148 (18)                     | 29 (4)                         | 71 (10)                        | 96 (15)                        | 95 (17)                         |
| Targeted therapy                                                              | 99 (12)                      | 20 (3)                         | 51 (7)                         | 69 (11)                        | 63 (11)                         |
| Immunotherapy                                                                 | 36 (4)                       | 5 (1)                          | 15 (2)                         | 19 (3)                         | 24 (4)                          |
| Chemotherapy *                                                                | 13 (2)                       | 4 (1)                          | 5 (1)                          | 8 (1)                          | 8 (1)                           |
| Discontinued second treatment<br>without third treatment<br>at last follow-up | 80 (10)                      | 0                              | 8 (1)                          | 35 (6)                         | 49 (9)                          |
| Remaining on second treatment<br>at last follow-up                            | 38 (5)                       | 26 (3)                         | 54 (8)                         | 50 (8)                         | 28 (5)                          |
| <b>Third treatment, any</b>                                                   | 30 (4)                       | 3 (<1)                         | 9 (1)                          | 11 (2)                         | 18 (3)                          |
| Targeted therapy                                                              | 14 (2)                       | 0                              | 3 (<1)                         | 5 (1)                          | 8 (1)                           |
| Immunotherapy                                                                 | 6 (1)                        | 0                              | 0                              | 1 (<1)                         | 4 (1)                           |
| Chemotherapy *                                                                | 10 (1)                       | 3 (<1)                         | 6 (1)                          | 5 (1)                          | 6 (1)                           |
| Discontinued third treatment<br>without fourth treatment<br>at last follow-up | 11 (1)                       | 0                              | 2 (<1)                         | 4 (1)                          | 4 (1)                           |
| Remaining on third treatment<br>at last follow-up                             | 10 (1)                       | 3 (<1)                         | 4 (1)                          | 5 (1)                          | 10 (2)                          |
| <b>Fourth treatment, any</b>                                                  | 9 (1)                        | 0                              | 3 (<1)                         | 2 (<1)                         | 4 (1)                           |
| Targeted therapy                                                              | 2 (<1)                       | 0                              | 0                              | 0                              | 0                               |
| Immunotherapy                                                                 | 2 (<1)                       | 0                              | 1 (<1)                         | 1 (<1)                         | 2 (<1)                          |
| Chemotherapy *                                                                | 5 (1)                        | 0                              | 2 (<1)                         | 1 (<1)                         | 2 (<1)                          |
| <b>Post-index TACE <sup>†</sup></b>                                           | 32 (4)                       | 6 (1)                          | 10 (1)                         | 8 (1)                          | 14 (3)                          |
| <b>EGD within 1 month post index</b>                                          | 37 (4)                       | 33 (4)                         | 32 (5)                         | 29 (5)                         | 25 (5)                          |
| <b>EGD &gt;1 month post index</b>                                             | 151 (18)                     | 143 (19)                       | 138 (19)                       | 131 (21)                       | 121 (22)                        |

\* Two consecutive claims for non-TACE chemotherapy. <sup>†</sup> Post-index TACE defined as NDC and HCPCS for any chemotherapy used for TACE (doxorubicin, doxorubicin HCl, cisplatin, doxorubicin HCl liposome, epirubicin, epirubicin HCl, mitomycin, and mitoxantrone HCl) in the post-index period, regardless of whether a TACE procedure code ±3 days from the TACE chemotherapy is or is not observed in the post-index period. Abbreviations: atezo+bev, atezolizumab plus bevacizumab; EGD, esophagogastroduodenoscopy; HCl, hydrochloride; HCPCS, Healthcare Common Procedure Coding System; NDC, National Drug Code; TACE, transarterial chemoembolization.

**Supplementary Table S3.** Baseline demographics and disease characteristics for non-switchers who did and did not remain on both atezolizumab plus bevacizumab at different time points of follow-up

| Characteristics                      | Duration of follow-up   |           |         |                         |           |         |                         |           |         |
|--------------------------------------|-------------------------|-----------|---------|-------------------------|-----------|---------|-------------------------|-----------|---------|
|                                      | Overall                 |           |         | ≥6 months               |           |         | ≥12 months              |           |         |
|                                      | Non-Switchers           |           |         | Non-Switchers           |           |         | Non-Switchers           |           |         |
|                                      | (N = 825)               |           |         | (n = 711)               |           |         | (n = 548)               |           |         |
|                                      | Remained on atezo+bev * |           |         | Remained on atezo+bev * |           |         | Remained on atezo+bev * |           |         |
|                                      | Yes                     | No        | P-value | Yes                     | No        | P-value | Yes                     | No        | P-value |
|                                      | (n = 217)               | (n = 449) |         | (n = 380)               | (n = 255) |         | (n = 121)               | (n = 327) |         |
| Age, years                           |                         |           |         |                         |           |         |                         |           |         |
| Mean (SD)                            | 68 (10)                 | 67 (9)    | 0.759   | 67 (8)                  | 67 (10)   | 0.848   | 67 (7)                  | 67 (9)    | 0.964   |
| Median                               | 68                      | 67        | 0.398   | 67                      | 67        | 0.773   | 66                      | 67        | 0.833   |
| Age group, years, n (%)              |                         |           | 0.629   |                         |           | 0.059   |                         |           | 0.484   |
| 18–34                                | 2 (1)                   | 3 (1)     |         | 0                       | 5 (2)     |         | 0                       | 5 (2)     |         |
| 35–44                                | 2 (1)                   | 5 (1)     |         | 5 (1)                   | 2 (1)     |         | 0                       | 2 (1)     |         |
| 45–54                                | 10 (5)                  | 12 (3)    |         | 15 (4)                  | 6 (2)     |         | 6 (5)                   | 10 (3)    |         |
| 55–64                                | 59 (27)                 | 137 (31)  |         | 121 (32)                | 78 (31)   |         | 43 (36)                 | 104 (32)  |         |
| ≥65                                  | 144 (66)                | 292 (65)  |         | 239 (63)                | 164 (64)  |         | 72 (60)                 | 206 (63)  |         |
| Male sex, n (%)                      | 174 (80)                | 354 (79)  | 0.760   | 308 (81)                | 197 (77)  | 0.245   | 100 (83)                | 252 (77)  | 0.201   |
| Geographical region, n (%)           |                         |           | 0.733   |                         |           | 0.261   |                         |           | 0.214   |
| South                                | 84 (39)                 | 169 (38)  |         | 145 (38)                | 101 (40)  |         | 43 (36)                 | 121 (37)  |         |
| West                                 | 62 (29)                 | 136 (30)  |         | 106 (28)                | 78 (31)   |         | 34 (28)                 | 100 (31)  |         |
| Midwest                              | 44 (20)                 | 87 (19)   |         | 88 (23)                 | 43 (17)   |         | 33 (27)                 | 62 (19)   |         |
| Northeast                            | 26 (12)                 | 57 (13)   |         | 41 (11)                 | 33 (13)   |         | 11 (9)                  | 44 (13)   |         |
| Unknown                              | 1 (<1)                  | 0         |         | 0                       | 0         |         | 0                       | 0         |         |
| Insurance type on index claim, n (%) |                         |           | 0.573   |                         |           | 0.780   |                         |           | 0.129   |



|                                              |           |           |              |           |           |              |           |           |              |
|----------------------------------------------|-----------|-----------|--------------|-----------|-----------|--------------|-----------|-----------|--------------|
| Mean (SD)                                    | 4.9 (2.5) | 5.0 (2.5) | 0.556        | 4.9 (2.5) | 5.1 (2.5) | 0.270        | 4.6 (2.4) | 5.1 (2.6) | 0.035        |
| CCI category, <i>n</i> (%)                   |           |           | 0.050        |           |           | 0.160        |           |           | 0.032        |
| 0                                            | 1 (<1)    | 6 (1)     |              | 3 (1)     | 5 (2)     |              | 1 (1)     | 6 (2)     |              |
| 1                                            | 2 (1)     | 2 (<1)    |              | 1 (<1)    | 2 (1)     |              | 1 (1)     | 0         |              |
| 2                                            | 47 (22)   | 64 (14)   |              | 60 (16)   | 29 (11)   |              | 25 (21)   | 40 (12)   |              |
| ≥3                                           | 167 (77)  | 377 (84)  |              | 316 (83)  | 219 (86)  |              | 94 (78)   | 281 (86)  |              |
| Prior treatment, <i>n</i> (%)                |           |           |              |           |           |              |           |           |              |
| Antihypertensives ¶                          | 134 (62)  | 250 (56)  | 0.155        | 224 (59)  | 141 (55)  | 0.361        | 69 (57)   | 185 (57)  | 0.932        |
| Analgesics                                   | 133 (61)  | 267 (59)  | 0.674        | 234 (62)  | 153 (60)  | 0.689        | 68 (56)   | 200 (61)  | 0.341        |
| Diuretics                                    | 66 (30)   | 126 (28)  | 0.525        | 108 (28)  | 70 (27)   | 0.790        | 30 (25)   | 90 (28)   | 0.562        |
| Antithrombotic agents                        | 45 (21)   | 98 (22)   | 0.841        | 83 (22)   | 55 (22)   | 0.935        | 27 (22)   | 71 (22)   | 0.891        |
| Systemic corticosteroids                     | 37 (17)   | 68 (15)   | 0.571        | 60 (16)   | 43 (17)   | 0.719        | 19 (16)   | 55 (17)   | 0.777        |
| Lactulose                                    | 19 (9)    | 45 (10)   | 0.675        | 36 (9)    | 30 (12)   | 0.354        | 11 (9)    | 33 (10)   | 0.752        |
| Rifaximin                                    | 6 (3)     | 22 (5)    | 0.223        | 18 (5)    | 10 (4)    | 0.624        | 1 (1)     | 19 (6)    | 0.023        |
| Antihemorrhagics                             | 0         | 0         | –            | 0         | 0         | –            | 0         | 0         | –            |
| Prior EGD, <i>n</i> (%)                      | 53 (24)   | 104 (23)  | 0.770        | 95 (25)   | 51 (20)   | 0.142        | 29 (24)   | 72 (22)   | 0.661        |
| Prior procedures, <i>n</i> (%)               |           |           |              |           |           |              |           |           |              |
| TARE/Y90/TARE                                | 26 (12)   | 51 (11)   | 0.798        | 48 (13)   | 28 (11)   | 0.530        | 12 (10)   | 42 (13)   | 0.398        |
| TACE **                                      | 5 (2)     | 22 (5)    | <sup>a</sup> | 13 (3)    | 16 (6)    | <sup>a</sup> | 3 (2)     | 20 (6)    | <sup>a</sup> |
| Radiation therapy                            | 6 (3)     | 16 (4)    | 0.652        | 12 (3)    | 11 (4)    | 0.445        | 4 (3)     | 13 (4)    | 1.000        |
| Resection/partial hepatectomy                | 1 (<1)    | 1 (<1)    | 0.546        | 1 (<1)    | 1 (<1)    | 1.000        | 1 (1)     | 1 (<1)    | 0.468        |
| Ablation                                     | 0         | 4 (1)     | 0.310        | 3 (1)     | 3 (1)     | 0.689        | 0         | 5 (2)     | 0.330        |
| Median follow-up time <sup>††</sup> , months | 7.0       | 17.4      | <0.001       | –         | –         | –            | –         | –         | –            |

\* Non-switchers defined as individuals with no claims other than atezo+bev. Individuals who restarted atezo+bev after discontinuation are also considered non-switchers; <sup>†</sup> Multiple responses; <sup>‡</sup> Ascites definition includes any of the following: any ascites ICD code, any cirrhosis ICD code (alongside loop diuretics and potassium-sparing diuretics), or paracentesis/thoracentesis procedure code; <sup>§</sup> Encephalopathy definition includes any of the following: any encephalopathy ICD code, prescription for lactulose, or prescription for rifaximin; ¶ Antihypertensives include medications that treat hypertension including those used in combination with diuretics; \*\* Any of the following chemotherapy is considered to be TACE if ≤2 claims for the same therapy are observed in the 3-month pre-index period: doxorubicin, doxorubicin HCl cisplatin, doxorubicin HCl liposome, epirubicin,

3  
4  
5  
6  
7  
8

epirubicin HCl, mitomycin, mitoxantrone HCl, gemcitabine HCl, and idarubicin HCl; <sup>††</sup> Follow-up time defined as time from index to minimum of last LRx claim, last Dx claim, last pharmacy stability date, and last provider stability date; <sup>a</sup> Corresponding p-values for TACE/TACE (drugs only) for both non-switcher groups over entire follow-up,  $\geq 6$  months of follow-up, and  $\geq 12$  months of follow-up, respectively were  $p = 0.512$ ,  $p = 0.128$ , and  $p = 0.689$ / $p = 0.293$ ,  $p = 0.388$ , and  $p = 0.374$ . Abbreviations: atezo+bev, atezolizumab plus bevacizumab; CCI, Charlson Comorbidity Index; Dx, IQVIA medical claims data; EGD, esophagogastroduodenoscopy; HCl, hydrochloride; ICD, International Classification of Disease; LRx, IQVIA longitudinal prescription data; SD, standard deviation; TACE, transarterial chemoembolization; TARE, transarterial radioembolization; Y90, yttrium-90.
